# Supplementary material for: Superhydrophobic fluorinated POSS–PVDF-HFP nanocomposite coating on glass by electrospinning
Source: Royal Society of Chemistry journal article supplement (doi:10.1039/c2jm33088a), 2012-01-01
Supplement: c2jm33088a.pdf [file c2jm33088a.pdf]

## Electronic Supplementary Information (ESI)

### **Superhydrophobic fluorinated POSS-PVDF-HFP nanocomposite coating on glass by electrospinning**

**V. Anand Ganesh,<sup>a,c</sup> A. Sreekumaran Nair,<sup>\*b</sup> Hemant Kumar Raut,<sup>a,e</sup> Tristan Tsai Yuan Tan,<sup>c</sup> Chaobin He,<sup>c,d</sup> Seeram Ramakrishna,<sup>a,e</sup> Jianwei Xu<sup>\*c</sup>**

<sup>a</sup>Department of Mechanical Engineering, National University of Singapore, 117574.

<sup>b</sup>Amrita Centre for Nanosciences, Amrita Institute of Medical Sciences, Amrita Vishwa Vidyapeetham, AIMS Ponnekkara P O, Kochi-682041, Kerala, India.  
Email:sreekumarannair@aims.amrita.edu

<sup>c</sup>Institute of Materials Research and Engineering, Agency for Science, Technology and Research, 3 Research Link, Singapore 117602. E-mail: jw-xu@imre.a-star.edu.sg

<sup>d</sup>Department of Materials Science & Engineering, National University of Singapore, 5 Engineering Drive 2, Singapore 117576.

<sup>e</sup>Center for Nanofibers & Nanotechnology, Nanoscience and Nanotechnology Initiative, National University of Singapore, Singapore.

Electronic Supplementary Information (ESI) 1

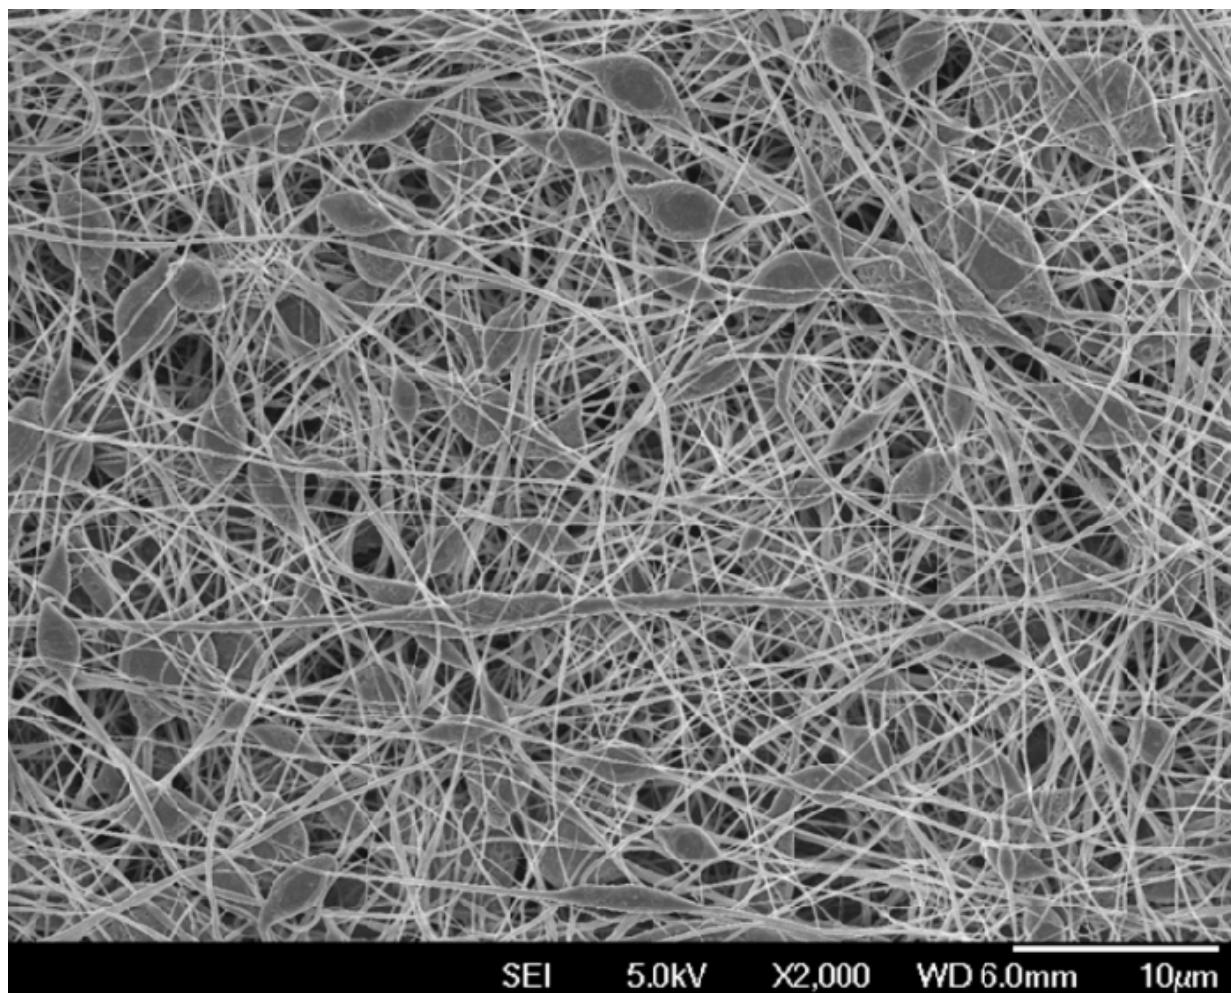

ES1: SEM Image of 20 wt. % FPSi8 fluoroPOSS in PVDF-HFP showing the formation of beaded nanofibers.

## Electronic Supplementary Information (ESI) 2

$^1\text{H}$ ,  $^{13}\text{C}$  NMR,  $^{29}\text{Si}$  nuclear magnetic resonance (NMR) spectra were recorded on a Bruker DRX 400 MHz spectrometer in  $\text{CDCl}_3$  at room temperature.  $^{19}\text{F}$  NMR spectra were recorded on an AC-300 MHz spectrometer in  $\text{CDCl}_3$  at room temperature. Spectrometer operating frequencies were 400.13 MHz ( $^1\text{H}$ ), 100.61 MHz ( $^{13}\text{C}$ ), 79.46 MHz ( $^{29}\text{Si}$ ) and 282.38 MHz ( $^{19}\text{F}$ ). Tetramethylsilane was used as an internal standard for  $^1\text{H}$ ,  $^{13}\text{C}$ , and  $^{29}\text{Si}$  NMR spectra. Trifluoroacetic acid was used as an external standard for  $^{19}\text{F}$  NMR spectra.

**FP8:** mp: 106–108 °C. Yield: 91%.  $\delta_{\text{H}}$  (400 MHz;  $\text{CDCl}_3$ ;  $\text{Me}_4\text{Si}$ , 45 °C), 2.74 (m, 16H), 2.67 (t, 16H), 2.35 (m, 16H), 1.07 (t, 16H).  $\delta_{\text{C}}$  (400 MHz;  $\text{CDCl}_3$ ;  $\text{Me}_4\text{Si}$ , 45 °C) 122.2–105.4 (m), 32.32, 27.12, 22.66, 18.55, -0.098.  $\delta_{\text{Si}}$  (400 MHz;  $\text{CDCl}_3$ ;  $\text{Me}_4\text{Si}$ , 45 °C) -68.54.  $\delta_{\text{F}}$  (300 MHz;  $\text{CDCl}_3$ ;  $\text{Me}_4\text{Si}$ , 45 °C) -5.05, -38.16, -45.64, -45.83, -46.66, -47.24, -50.07. MS (MALDITOF,  $m/z$ )  $[\text{M} + \text{Ag}]^+$ : 4582.79. Found: C, 25.81; H, 1.87. Calc. for  $\text{C}_96\text{H}_{64}\text{F}_{136}\text{O}_{12}\text{S}_8\text{Si}_8$ : C, 25.77; H, 1.44%.

**FPSi8:** mp: 69–71 °C. Yield: 88%.  $\delta_{\text{H}}$  (400 MHz;  $\text{CDCl}_3$ ;  $\text{Me}_4\text{Si}$ ) 2.73 (m, 16H), 2.63 (t, 16H), 2.35 (m, 16H), 0.99 (t, 16H), 0.20 (s, 48H).  $\delta_{\text{C}}$  (400 MHz;  $\text{CDCl}_3$ ;  $\text{Me}_4\text{Si}$ ) 122.2–105.5 (m), 32.32, 27.12, 22.66, 18.55, -0.10.  $\delta_{\text{Si}}$  (400 MHz;  $\text{CDCl}_3$ ;  $\text{Me}_4\text{Si}$ ) 11.79, -108.87.  $\delta_{\text{F}}$  (300 MHz;  $\text{CDCl}_3$ ;  $\text{Me}_4\text{Si}$ ) -5.01, -38.53, -45.92, -46.11, -46.92, -47.52, -50.33. MS (MALDI-TOF,  $m/z$ )  $[\text{M} + \text{Ag}]^+$ : 5175.65. Found: C, 26.70; H, 2.55. Calc. For  $\text{C}_{112}\text{H}_{112}\text{F}_{136}\text{O}_{20}\text{S}_8\text{Si}_{16}$ : C, 26.54; H, 2.23%.
